# Supplementary material
Source: MDPI journal article supplement (doi:10.3390/agriculture16101057)
Supplement: s1 [file agriculture-4255634-supplementary.pdf › agriculture-4255634-supplementary.pdf]

# Effects of suckling piglets learning feeding behavior from the sow on their welfare and jejenum morphological development

Sitong Zhou <sup>1</sup>, Zhiyang Zhang <sup>1</sup>, Yameng Li <sup>1</sup>, Ying Qian <sup>1</sup>, Zhihao Zhang <sup>1</sup>, Xuanning Liu <sup>1</sup>,  
Zhonghui Wang <sup>1</sup>, Zhipeng Wang <sup>1,2</sup> and Honggui Liu <sup>1,2\*</sup>

<sup>1</sup> *College of Animal Science and Technology, Northeast Agricultural University, Changjiang Road No. 600, 150030 Harbin, Heilongjiang, P.R. China*

<sup>2</sup> *Key Laboratory of Swine Facilities Engineering, Ministry of Agriculture and Rural Affairs, Changjiang Road No. 600, 150030 Harbin, Heilongjiang, P.R. China*

\*Corresponding author: Honggui Liu. Email: [Hg.Liu@neau.edu.cn](mailto:Hg.Liu@neau.edu.cn)

## Supplementary material

Table S1. Baseline characteristics of sows and litters in the SL and SF groups.

| Parameter                            | SL group (n=6) | SF group (n=6) | P-value |
|--------------------------------------|----------------|----------------|---------|
| Sow parity                           | 2.5 ± 0        | 2.5 ± 0        | 1       |
| Number of live piglets per litter    | 11.33 ± 1.21   | 11.40 ± 1.34   | >0.05   |
| Average birth weight per piglet (kg) | 1.31 ± 0.12    | 1.180 ± 0.08   | >0.05   |
| Sex ratio (male/female)              | 1.04 ± 0.11    | 0.96 ± 0.09    | >0.05   |

Table S2. Nutrient composition and content of feed<sup>1</sup>

| Nutrition        | suckling piglet feed | suckling sow feed | weaning piglet feed |
|------------------|----------------------|-------------------|---------------------|
|                  | content (%)          |                   |                     |
| Crude protein    | ≥ 18.0               | ≥ 17.0            | ≥ 16.5              |
| Coarse fiber     | ≤ 4.0                | ≤ 7.0             | ≤ 6.0               |
| Crude ash        | ≤ 7.0                | ≤ 9.0             | ≤ 7.0               |
| Moisture         | ≤ 14.0               | ≤ 14.0            | ≤ 14.0              |
| Total phosphorus | ≥ 0.5                | ≥ 0.5             | ≥ 0.45              |
| Sodium chloride  | 0.3-1.49             | 0.3-1.2           | 0.3-1.2             |
| Calcium          | 0.4-1.5              | 0.7-1.3           | 0.5-1.2             |
| Lysine           | ≥ 1.35               | ≥ 1.1             | ≥ 1.2               |

<sup>1</sup> The feed used in the tests were purchased from Wellhope Foods Co., Ltd.

### 3. Piglet behavioural categories and definitions.

| Behavioural categories              | Definitions                                                                             |
|-------------------------------------|-----------------------------------------------------------------------------------------|
| Manipulating feed within trough     | Rooting, exploring, chewing or swallowing feed in troughs                               |
| Manipulating spilled feed of trough | Rooting, exploring, chewing or swallowing feed that falls to the ground from the trough |

## Figure captions

**Figure S1:**

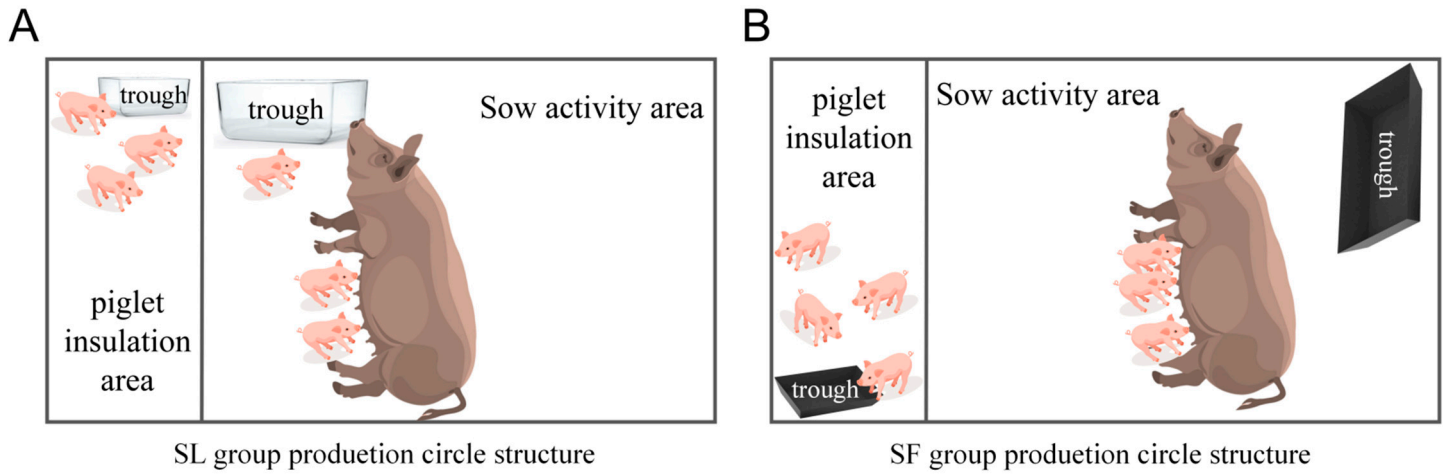

**Figure S1:** Production circle structure. A: SL group production circle structure. B: SF group production circle structure. SL = Sow-Learning group; SF = Separate-Feeding group.
